# Supplementary material for: Placebo response rates and potential modifiers in double-blind randomized controlled trials of second and newer generation antidepressants for major depressive disorder in children and adolescents: a systematic review and meta-regression analysis
Source: PubMed Central journal article supplement (PMC7056684; doi:10.1007/s00787-018-1244-7), 2018-12-08
Supplement: 787_2018_1244_MOESM1_ESM.pdf [file 787_2018_1244_MOESM1_ESM.pdf]

## Supplementary appendix to the manuscript

| Study                                     | dur_depres_epis_at |              | mean | sample_chance_ |             |      | drug                    | fund_source                        | Cut_off_ba         |            |            | resp_measure | resp_def | CoPsychotherapy | studysites        | Nstudy_       |    | Clin_Nresp_pb   | Self_Nresp_pb | NITT_pb |             |
|-------------------------------------------|--------------------|--------------|------|----------------|-------------|------|-------------------------|------------------------------------|--------------------|------------|------------|--------------|----------|-----------------|-------------------|---------------|----|-----------------|---------------|---------|-------------|
|                                           | pub_year           | intake (m)   |      | age            | prop_female | size |                         |                                    | plac               | drug class | Sum_risk_o |              |          |                 |                   | f_Bias        | n  |                 |               |         | sesever_cli |
| Atkinson, 2014                            | 2014               | NR           | 10   | 13,2           | 0,52        | 337  | 0,33 SSRI, SSNRI        | Fluoxetine, Duloxetine             | industry sponsored | low        | moderate   |              | CDRS     | reduction ≥ 50% | PT not prohibited | multi-center  | 65 | no run-in phase | 64            |         | 103         |
| Berard, 2006                              | 2006               | NR           | 12   | 15,6           | 0,67        | 286  | 0,50 SSRI               | Paroxetine                         | industry sponsored | low        | moderate   | moderate     | MADRS    | reduction ≥ 50% | PT prohibited     | multi-center  | 33 | run-in phase    | 53            | 52      | 99          |
| Bristol-Myers Squibb, 2002a               | 2002               | NR           | 8    | 12,0           | 0,50        | 284  | 0,33 DAS, DSA           | Nefazodone                         | industry sponsored | moderate   | moderate   |              | #NULL!   | #NULL!          | PT not prohibited | multi-center  | 28 | no run-in phase | 21            |         | 94          |
| Eli Lilly, 2004                           | 2004               | NR           | 6    | 15,6           | 0,55        | 40   | 0,50 SSRI               | Fluoxetine                         | industry sponsored | moderate   | moderate   | moderate     | #NULL!   | #NULL!          | PT not prohibited | single-center | 1  | run-in phase    | 11            | 3       | 19          |
| Emslie, 1997                              | 1997               | 3,4          | 8    | 12,4           | 0,46        | 96   | 0,50 SSRI               | Fluoxetine                         | independent        | low        | moderate   | mild         | CGI-I    | score of 1 or 2 | PT not prohibited | single-center | 1  | run-in phase    | 16            | 18      | 48          |
| Emslie, 2002a                             | 2002               | 15,3         | 9    | 12,7           | 0,49        | 219  | 0,50 SSRI               | Fluoxetine                         | industry sponsored | moderate   | moderate   |              | CDRS     | reduction ≥ 50% | PT prohibited     | multi-center  | 15 | run-in phase    | 41            |         | 110         |
| Emslie, 2002b/Bristol-Myers Squibb, 2002b | 2002               | NR           | 8    | 15,0           | 0,60        | 206  | 0,50 DSA                | Nefazodone                         | industry sponsored | moderate   |            |              | CGI-I    | score of 1 or 2 | PT not prohibited | multi-center  | 15 | no run-in phase | 40            |         | 100         |
| Emslie, 2006                              | 2006               | 24,9         | 8    | 12,0           | 0,47        | 206  | 0,50 SSRI               | Paroxetine                         | industry sponsored | low        | severe     | moderate     | CGI-I    | score of 1 or 2 | PT prohibited     | multi-center  | 41 | no run-in phase | 46            | 41      | 102         |
| Emslie, 2007a                             | 2007               | 23,1         | 8    | 12,2           | 0,50        | 165  | 0,50 SSNRI              | Venlafaxine                        | industry sponsored | moderate   | moderate   |              | HAMD     | reduction ≥ 50% | PT not prohibited | multi-center  | 14 | run-in phase    | 28            |         | 85          |
| Emslie, 2007b                             | 2007               | 23,1         | 8    | 12,2           | 0,42        | 201  | 0,50 SSNRI              | Venlafaxine                        | industry sponsored | moderate   | moderate   |              | HAMD     | reduction ≥ 50% | PT not prohibited | multi-center  | 37 | run-in phase    | 51            |         | 98          |
| Emslie, 2009                              | 2009               | 16,5         | 8    | 14,6           | 0,59        | 316  | 0,50 SSRI               | Escitalopram                       | industry sponsored | moderate   | moderate   |              | CDRS     | reduction ≥ 50% | PT not prohibited | multi-center  | 40 | run-in phase    | 81            |         | 158         |
| Emslie, 2014                              | 2014               | NR           | 10   | 13,0           | 0,51        | 463  | 0,25 SSRI, SSNRI, SSNRI | Fluoxetine, Duloxetine             | industry sponsored | low        | moderate   |              | CDRS     | reduction ≥ 50% | PT not prohibited | multi-center  | 60 | no run-in phase | 70            |         | 122         |
| Findling, 2009                            | 2009               | 61,2         | 8    | 16,5           | 0,15        | 34   | 0,50 SSRI               | Fluoxetine                         | industry sponsored | low        | moderate   | mild         | CGI-I    | score of 1 or 2 | PT not prohibited | single-center | 1  | no run-in phase | 6             | 7       | 16          |
| GlaxoSmithKline, 2013                     | 2013               | NR           | 8    | 14,6           | 0,61        | 56   | 0,50 SSRI               | Paroxetine                         | industry sponsored | moderate   |            |              | CGI-I    | score of 1 or 2 | PT not prohibited | multi-center  | 33 | run-in phase    | 11            |         | 27          |
| Keller, 2001                              | 2001               | 13,0         | 8    | 14,9           | 0,62        | 275  | 0,33 SSRI               | Paroxetine                         | industry sponsored | low        | moderate   |              | CGI-I    | score of 1 or 2 | PT prohibited     | multi-center  | 12 | no run-in phase | 42            |         | 87          |
| March, 2004                               | 2004               | 8,9 (median) | 12   | 14,6           | 0,54        | 439  | 0,50 SSRI               | Fluoxetine                         | independent        | low        | moderate   | moderate     | CGI-I    | score of 1 or 2 | PT prohibited     | multi-center  | 13 | no run-in phase | 39            | 1       | 112         |
| Organon, 2002a/Cheung, 2005               | 2002               | NR           | 8    | 12,3           | 0,51        | 126  | 0,50 NaSSA              | Remeron                            | industry sponsored | moderate   |            |              | CGI-I    | score of 1 or 2 | PT not prohibited | multi-center  | 17 | no run-in phase | 25            |         | 44          |
| Organon, 2002b/Cheung, 2005               | 2002               | NR           | 8    | 12,0           | 0,53        | 133  | 0,50 NaSSA              | Remeron                            | industry sponsored | moderate   |            |              | CGI-I    | score of 1 or 2 | PT not prohibited | multi-center  | 17 | no run-in phase | 17            |         | 45          |
| von Knorring, 2006                        | 2006               | NR           | 12   | 16,0           |             | 244  | 0,50 SSRI               | Citalopram                         | industry sponsored | moderate   | moderate   |              | MADRS    | reduction ≥ 50% | PT not prohibited | multi-center  | 31 | no run-in phase | 44            |         | 120         |
| Wagner, 2003                              | 2003               | NR           | 10   | 12,0           | 0,51        | 376  | 0,50 SSRI               | Sertraline                         | industry sponsored | low        | severe     |              | CGI-I    | score of 1 or 2 | PT prohibited     | multi-center  | 53 | no run-in phase | 95            |         | 187         |
| Wagner, 2004                              | 2004               | 20,0         | 8    | 12,1           | 0,53        | 178  | 0,50 SSRI               | Citalopram                         | industry sponsored | moderate   | moderate   |              | CGI-I    | score of 1 or 2 | PT not prohibited | multi-center  | 21 | run-in phase    | 38            |         | 85          |
| Wagner, 2006                              | 2006               | 15,6         | 8    | 12,3           | 0,52        | 268  | 0,50 SSRI               | Escitalopram                       | industry sponsored | low        | moderate   |              | CGI-I    | score of 1 or 2 | PT not prohibited | multi-center  | 25 | run-in phase    | 69            |         | 136         |
| Pfizer, 2016                              | 2016               | NR           | 8    | 12,7           | 0,54        | 340  | 0,33 SNRI, SSRI         | Desvenlafaxine, Fluoxetine         | industry sponsored | moderate   |            |              | CGI-I    | score of 1 or 2 | PT not prohibited | multi-center  | 44 | no run-in phase | 62            |         | 112         |
| Pfizer, 2017                              | 2017               | NR           | 8    | 13,0           | 0,57        | 363  | 0,33 SNRI               | Desvenlafaxine, high- and low dose | industry sponsored | moderate   |            |              | CGI-I    | score of 1 or 2 | PT not prohibited | multi-center  | 42 | no run-in phase | 57            |         | 120         |

pub\_year=publication year; prop\_female=proportion female; chance\_plac=chance to receive placebo; fund\_source=funding source; Cut\_off\_basesever\_clin=Cut-off baseline severity clinician-rated; Cut\_of\_basesever\_self= Cut-off baseline severity self-rated; resp\_measure\_scale=response measurement scale; resp\_def=response definition; CoPsychotherapy=concomitant psychotherapy; Nstudy sites=number of study sites; runinphase\_imp.=run-in phase imputed; Clin\_Nresp\_pb=number of placebo responder clinician-rated; Self\_Nresp\_pb=number of placebo responder self-rated; NITT\_pb=number of intention-to-treat population; #NULL!/NR=not reported
